# Supplementary material for: Epidemiology and timing of seasonal influenza epidemics in the Asia-Pacific region, 2010–2017: implications for influenza vaccination programs
Source: Springer Nature journal article supplement (doi:10.1186/s12889-019-6647-y), 2019-03-21
Supplement: MOESM1 [file 16566778]

**Supplementary Table 1. Number and proportion of influenza cases in each influenza transmission zone and country overall, by type, and by subtype/lineage for 2010–2017**

| Influenza transmission zone/country | n (% of influenza cases) |                |                |                |                |                         |              |               |                       |
|-------------------------------------|--------------------------|----------------|----------------|----------------|----------------|-------------------------|--------------|---------------|-----------------------|
|                                     | Any influenza            | Any A          | Any B          | A(H3N2)        | A(H1N1)        | A (other, not subtyped) | B Victoria   | B Yamagata    | B (not characterized) |
| <i>Eastern Asia</i>                 | 563,511                  | 381,783 (67.8) | 181,728 (32.2) | 254,386 (45.1) | 120,276 (21.3) | 7,121 (1.3)             | 47,888 (8.5) | 59,381 (10.5) | 74,459 (13.2)         |
| China                               | 473,583                  | 315,130 (66.5) | 158,453 (33.5) | 216,505 (45.7) | 91,593 (19.3)  | 7,032 (1.5)             | 41,527 (8.8) | 51,787 (10.9) | 65,139 (13.8)         |
| Japan                               | 69,123                   | 53,819 (77.9)  | 15,304 (22.1)  | 29,872 (43.2)  | 23,911 (34.6)  | 36 (0.1)                | 6,219 (9.0)  | 7,419 (10.7)  | 1,666 (2.4)           |
| Mongolia                            | 4,055                    | 2,727 (67.3)   | 1,328 (32.7)   | 1,831 (45.2)   | 844 (20.8)     | 52 (1.3)                | 142 (3.5)    | 175 (4.3)     | 1,011 (24.9)          |
| South Korea                         | 16,750                   | 10,107 (60.3)  | 6,643 (39.7)   | 6,178 (36.9)   | 3,928 (23.5)   | 1 (0.0)                 | 0 (0.0)      | 0 (0.0)       | 6,643 (39.7)          |
| <i>Southern Asia</i>                | 54,400                   | 41,885 (77.0)  | 12,515 (23.0)  | 11,136 (20.5)  | 27,570 (50.7)  | 3,179 (5.8)             | 619 (1.1)    | 777 (1.4)     | 11,119 (20.4)         |
| Bangladesh                          | 5,582                    | 3,631 (65.0)   | 1,951 (35.0)   | 1,851 (33.2)   | 1,778 (31.9)   | 2 (0.0)                 | 456 (8.2)    | 390 (7.0)     | 1,105 (19.8)          |
| India                               | 21,082                   | 18,024 (85.5)  | 3,058 (14.5)   | 2,898 (13.7)   | 15,124 (71.7)  | 2 (0.0)                 | 59 (0.3)     | 41 (0.2)      | 2,958 (14.0)          |
| Iran                                | 9,807                    | 7,139 (72.8)   | 2,668 (27.2)   | 2,756 (28.1)   | 4,378 (44.6)   | 5 (0.1)                 | 2 (0.0)      | 0 (0.0)       | 2,666 (27.2)          |
| Nepal <sup>a</sup>                  | 7,863                    | 5,590 (71.1)   | 2,273 (28.9)   | 2,195 (27.9)   | 3,394 (43.2)   | 1 (0.0)                 | 36 (0.5)     | 273 (3.5)     | 1,964 (25.0)          |
| Pakistan <sup>b</sup>               | 2,547                    | 1,929 (75.7)   | 618 (24.3)     | 391 (15.4)     | 1,072 (42.1)   | 466 (18.3)              | 66 (2.6)     | 73 (2.9)      | 479 (18.8)            |
| Sri Lanka                           | 7,519                    | 5,572 (74.1)   | 1,947 (25.9)   | 1,045 (13.9)   | 1,824 (24.3)   | 2,703 (35.9)            | 0 (0.0)      | 0 (0.0)       | 1,947 (25.9)          |
| <i>South-East Asia</i>              | 44,681                   | 28,483 (63.7)  | 16,198 (36.3)  | 15,111 (33.8)  | 12,802 (28.7)  | 570 (1.3)               | 2,052 (4.6)  | 2,839 (6.4)   | 11,307 (25.3)         |
| Cambodia                            | 4,077                    | 2,539 (62.3)   | 1,538 (37.7)   | 1,335 (32.7)   | 1,158 (28.4)   | 46 (1.1)                | 180 (4.4)    | 80 (2.0)      | 1,278 (31.3)          |
| Indonesia                           | 7,567                    | 4,384 (57.9)   | 3,183 (42.1)   | 2,741 (36.2)   | 1,622 (21.4)   | 21 (0.3)                | 0 (0.0)      | 0 (0.0)       | 3,183 (42.1)          |
| Laos <sup>c</sup>                   | 3,216                    | 1,907 (59.3)   | 1,309 (40.7)   | 1,345 (41.8)   | 559 (17.4)     | 3 (0.1)                 | 430 (13.4)   | 194 (6.0)     | 685 (21.3)            |
| Philippines                         | 5,451                    | 3,013 (55.3)   | 2,438 (44.7)   | 1,199 (22.0)   | 1,436 (26.3)   | 378 (6.9)               | 371 (6.8)    | 818 (15.0)    | 1,249 (22.9)          |
| Singapore                           | 10,317                   | 7,441 (72.1)   | 2,876 (27.9)   | 3,867 (37.5)   | 3,477 (33.7)   | 97 (0.9)                | 610 (5.9)    | 1,010 (9.8)   | 1,256 (12.2)          |
| Thailand                            | 7,860                    | 5,190 (66.0)   | 2,670 (34.0)   | 2,551 (32.5)   | 2,627 (33.4)   | 12 (0.2)                | 461 (5.9)    | 732 (9.3)     | 1,477 (18.8)          |
| Vietnam                             | 6,193                    | 4,009 (64.7)   | 2,184 (35.3)   | 2,073 (33.5)   | 1,923 (31.1)   | 13 (0.2)                | 0 (0.0)      | 5 (0.1)       | 2,179 (35.2)          |
| <i>Oceania-Melanesia-Polynesia</i>  | 49,142                   | 36,112 (73.5)  | 13,030 (26.5)  | 16,915 (34.4)  | 7,397 (15.1)   | 11800 (24.0)            | 138 (0.3)    | 711 (1.4)     | 12,181 (24.8)         |
| Australia                           | 33,393                   | 25,500 (76.4)  | 7,893 (23.6)   | 12,933 (38.7)  | 5,144 (15.4)   | 7,423 (22.2)            | 17 (0.1)     | 105 (0.3)     | 7,771 (23.3)          |
| New Zealand                         | 15,749                   | 10,612 (67.4)  | 5,137 (32.6)   | 3,982 (25.3)   | 2,253 (14.3)   | 4,377 (27.8)            | 121 (0.8)    | 606 (3.8)     | 4,410 (28.0)          |
| <i>Total</i>                        | 711,734                  | 488,263        | 223,471        | 297,548 (41.8) | 168,045 (23.6) | 22,670 (3.2)            | 5,0697 (7.1) | 63,708 (9.0)  | 109,066 (15.3)        |

(68.6)

(31.4)

---

<sup>a</sup> Data were available for 2012–2017

<sup>b</sup> Data were available for 2010–2016

<sup>c</sup> Data were available for 2011–2017
