# Supplementary material for: Epidemiology and timing of seasonal influenza epidemics in the Asia-Pacific region, 2010–2017: implications for influenza vaccination programs
Source: Springer Nature journal article supplement (doi:10.1186/s12889-019-6647-y), 2019-03-21
Supplement: MOESM2 [file 16566778]

**Supplementary Table 2. Number and proportion of influenza cases each year overall, by type, and by subtype/lineage**

| Year         | Any influenza  | n (% of cases)        |                       |                       |                       |                         |                     |                     |                       |
|--------------|----------------|-----------------------|-----------------------|-----------------------|-----------------------|-------------------------|---------------------|---------------------|-----------------------|
|              |                | Any A                 | Any B                 | A(H3N2)               | A(H1N1)               | A (other, not subtyped) | B Victoria          | B Yamagata          | B not characterized   |
| 2010         | 73,770         | 44,850 (60.8)         | 28,920 (39.2)         | 16,542 (22.4)         | 24,108 (32.7)         | 4,200 (5.7)             | 2,871 (3.9)         | 1,759 (2.4)         | 24,290 (32.9)         |
| 2011         | 48,181         | 33,401 (69.3)         | 14,780 (30.7)         | 10,564 (21.9)         | 21,232 (44.1)         | 1,605 (3.3)             | 2,827 (5.9)         | 1,047 (2.2)         | 10,906 (22.6)         |
| 2012         | 73,707         | 40,929 (55.5)         | 32,778 (44.5)         | 34,875 (47.3)         | 3,916 (5.3)           | 2,138 (2.9)             | 10,178 (13.8)       | 4,523 (6.1)         | 18,077 (24.5)         |
| 2013         | 55,696         | 44,148 (79.3)         | 11,548 (20.7)         | 25,208 (45.3)         | 17,756 (31.9)         | 1,184 (2.1)             | 937 (1.7)           | 2,886 (5.2)         | 7,725 (13.9)          |
| 2014         | 99,293         | 71,346 (71.9)         | 27,947 (28.1)         | 42,340 (42.6)         | 27,069 (27.3)         | 1,937 (2.0)             | 1,395 (1.4)         | 10,420 (10.5)       | 16,132 (16.2)         |
| 2015         | 104,312        | 75,316 (72.2)         | 28,996 (27.8)         | 57,426 (55.1)         | 15,271 (14.6)         | 2,619 (2.5)             | 1,482 (1.4)         | 17,960 (17.2)       | 9,554 (9.2)           |
| 2016         | 120,381        | 75,268 (62.5)         | 45,113 (37.5)         | 39,459 (32.8)         | 33,299 (27.7)         | 2,510 (2.1)             | 22,910 (19.0)       | 7,479 (6.2)         | 14,724 (12.2)         |
| 2017         | 136,394        | 103,005 (75.5)        | 33,389 (24.5)         | 71,134 (52.2)         | 25,394 (18.6)         | 6,477 (4.7)             | 8,097 (5.9)         | 17,634 (12.9)       | 7,658 (5.6)           |
| <i>Total</i> | <i>711,734</i> | <i>488,263 (68.6)</i> | <i>22,3471 (31.4)</i> | <i>297,548 (41.8)</i> | <i>168,045 (23.6)</i> | <i>22,670 (3.2)</i>     | <i>50,697 (7.1)</i> | <i>63,708 (9.0)</i> | <i>109,066 (15.3)</i> |
